# Supplementary material for: Solution-Plasma Synthesis and Characterization of Transition Metals and N-Containing Carbon–Carbon Nanotube Composites
Source: MDPI journal article supplement (doi:10.3390/ma17020320), 2024-01-08
Supplement: s1 [file s1]

Supplementary Materials

**Table S1.** Comparison of ORR performance with other carbon materials.

| Catalyst     | Doped element                                 | Onset potential (V) | Half-wave potential (V) | Reference  |
|--------------|-----------------------------------------------|---------------------|-------------------------|------------|
| Co-NC@CNT    | N - 0.8 at%<br>Fe - 0.1 at%<br>Co - 0.2 at%   | 0.783               | 0.693                   | This study |
| Ni-NC@CNT    | N - 0.7 at%<br>Fe - 0.1 at%<br>Co - 0.1 at%   | 0.749               | 0.686                   | This study |
| FePc-Py-CNTs |                                               |                     | 0.915                   | 1          |
| Fe-N-CNP-CNF | N - 1.16 at%<br>Fe - 0.15 at%                 | 0.864               |                         | 2          |
| FeNI-CNS     | N - 1.18 at%<br>I - 4.10 at%<br>Fe - 0.22 at% | 0.968               | 0.847                   | 3          |
| Fe/N-CNT     | N - 8.42 at%<br>Fe - 1.57 at%                 | 0.96                | 0.81                    | 4          |
| Co/N-CNT     | N - 8.36 at%<br>Co - 1.63 at%                 | 0.94                | 0.84                    | 4          |
| Ni/N-CNT     | N - 8.49 at%<br>Ni - 1.73 at%                 | 0.91                | 0.73                    | 4          |
| NCNP-CNF     | N - 1.35 at%                                  | 0.824               |                         | 5          |
| NGS          | N - 6.00 at%                                  | 0.784               | 0.684                   | 6          |
| NCNS         | N - 1.30 at%                                  | 0.794               |                         | 7          |
| FP-NCNs-SP   | N - 2.3 at%<br>Fe - <0.1 at%                  | 0.902               |                         | 8          |
| Co@N/GNP     |                                               | 0.98                | 0.87                    | 9          |
| rGO          |                                               | 0.77                | 0.65                    | 10         |
| NrGO800      | N - 12.9 at%                                  | 0.88                | 0.76                    | 10         |
| CSCNT        |                                               | 0.749               | 0.667                   | This study |
| Pt/C         | Pt - 20 wt. %                                 | 0.954               | 0.86                    | This study |

## References

1. Cao, R.; Thapa, R.; Kim, H.; Xu, X.; Kim, M. G.; Li, Q.; Park, N.; Liu, M.; Cho, J. Promotion of oxygen reduction by a bio-inspired tethered iron phthalocyanine carbon nanotube-based catalyst. *Nat. Commun.* **2013**, *4*, 2076. [CrossRef]
2. Panomsuwan, G.; Saito, N.; Ishizaki, T. Fe–N-doped carbon-based composite as an efficient and durable electrocatalyst for the oxygen reduction reaction. *RSC Adv.* **2016**, *6*, 114553–114559. [CrossRef]
3. Kim, H.; Cha, B.; Kim, D., Simultaneous introduction of iodine and Fe–N<sub>x</sub> into carbon nanospheres for enhanced catalytic activity towards oxygen reduction using a solution plasma process. *Electrochem. Commun.* **2023**, *156*, 107589. [CrossRef]
4. Liu, Y.; Jiang, H.; Zhu, Y.; Yang, X.; Li, C. Transition metals (Fe, Co, and Ni) encapsulated in nitrogen-doped carbon nanotubes as bi-functional catalysts for oxygen electrode reactions. *J. Mater. Chem. A.* **2016**, *4*, 1694–1701. [CrossRef]
5. Panomsuwan, G.; Saito, N.; Ishizaki, T. Nitrogen-Doped Carbon Nanoparticle–Carbon Nanofiber Composite as an Efficient Metal-Free Cathode Catalyst for Oxygen Reduction Reaction. *ACS Appl. Mater. Interfaces* **2016**, *8*, 6962–6971 (2016). [CrossRef]
6. Lee, S.; Saito, N., Enhancement of nitrogen self-doped nanocarbons electrocatalyst via tune-up solution plasma synthesis. *RSC Adv.* **2018**, *8*, 35503–35511. [CrossRef]
7. Hyun, K.; Ueno, T.; Li, O.L.; Saito, N. Synthesis of heteroatom-carbon nanosheets by solution plasma processing using N-methyl-2-pyrrolidone as precursor. *RSC Adv.* **2016**, *6*, 6990–6996. [CrossRef]
8. Hyun, K.; Ueno, T.; Panomsuwan, G.; Li, O.L.; Saito, N. Heterocarbon nanosheets incorporating iron phthalocyanine for oxygen reduction reaction in both alkaline and acidic media. *Phys. Chem. Chem. Phys.* **2016**, *18*, 10856–10863. [CrossRef]
9. Jeong, S.; Kim, S.; Son, H.; Li, O. L., Plasma-engineered cobalt nanoparticle encapsulated N-doped graphene nanoplatelets as high-performance oxygen reduction reaction electrocatalysts for aluminum–air batteries. *Catal. Today* **2023**, *420*, 114025. [CrossRef]
10. Lemes, G.; Sebastian, D.; Pastor, E.; Lazaro, J. M. N-doped graphene catalysts with high nitrogen concentration for the oxygen reduction reaction. *J. Power Sources.* **2019**, *438*, 227036. [CrossRef]

**Disclaimer/Publisher's Note:** The statements, opinions and data contained in all publications are solely those of the individual author(s) and contributor(s) and not of MDPI and/or the editor(s). MDPI and/or the editor(s) disclaim responsibility for any injury to people or property resulting from any ideas, methods, instructions or products referred to in the content.
